# Supplementary material for: Engineering Two-Phase Bifunctional Oxygen Electrocatalysts with Tunable and Synergetic Components for Flexible Zn–Air Batteries
Source: PubMed Central journal article supplement (PMC8124028; doi:10.1007/s40820-021-00650-2), 2021-05-15
Supplement: 40820_2021_650_MOESM1_ESM.pdf [file 40820_2021_650_MOESM1_ESM.pdf]

Supporting Information for

## **Engineering Two-Phase Bifunctional Oxygen Electrocatalysts with Tunable and Synergetic Components for Flexible Zn-Air Batteries**

Yanli Niu<sup>1</sup>, Xue Teng<sup>1</sup>, Shuaiqi Gong<sup>1</sup>, Mingze Xu<sup>1</sup>, Shi-Gang Sun<sup>2, \*</sup>, Zuofeng Chen<sup>1, \*</sup>

<sup>1</sup>Shanghai Key Laboratory of Chemical Assessment and Sustainability, School of Chemical Science and Engineering, Tongji University, Shanghai 200092, P. R. China

<sup>2</sup>State Key Lab of Physical Chemistry of Solid Surface, College of Chemistry and Chemical Engineering, Xiamen University, Xiamen 361005, P. R. China

\*Corresponding authors. E-mail: [sgsun@xmu.edu.cn](mailto:sgsun@xmu.edu.cn) (S. G. Sun); [zfchen@tongji.edu.cn](mailto:zfchen@tongji.edu.cn) (Z. F. Chen)

### **S1 Experimental Section**

**Materials:** Ruthenium oxide ( $\text{RuO}_2$ ,  $\geq 99.9\%$ ) and Nafion (5 wt % solution in aliphatic alcohols and water) were purchased from Sigma-Aldrich. Iron(III) nitrate nonahydrate ( $\text{Fe}(\text{NO}_3)_3 \cdot 9\text{H}_2\text{O}$ ), cobaltous(II) nitrate hexahydrate ( $\text{Co}(\text{NO}_3)_2 \cdot 6\text{H}_2\text{O}$ ) and potassium hydroxide standard solution (1 M, 99%) were obtained from Aladdin Reagent. Methanol ( $\text{CH}_3\text{OH}$ ,  $\geq 99.9\%$ ), *p*-phenylenediamine ( $\text{C}_6\text{H}_4(\text{NH}_2)_2$ , PPD), *n*-hexane ( $\text{C}_6\text{H}_{14}$ ) and zinc acetate ( $\text{Zn}(\text{CH}_3\text{COO})_2$ ) were bought from Shanghai Macklin Chemical Reagent Co. Ltd. Commercial 20 wt% Pt/C was purchased from Johnson-Matthey. All chemical reagents in this work were analytical grade and employed without further purification. Deionized water ( $18.0 \text{ M}\Omega \cdot \text{cm}$ ) was used throughout all experiments.

**Synthesis of Co-PPD complex:** In a typical procedure, 1.0 g *p*-phenylenediamine was dissolved in 20 mL methanol, which was subsequently added into 20 mL methanol containing 0.9 g  $\text{Co}(\text{NO}_3)_2 \cdot 6\text{H}_2\text{O}$ . After stirring for a while, the homogeneous solution was transferred into a 50 mL Teflon-lined autoclave, which was sealed and maintained at 120 °C for 8 h and then naturally cooled to room temperature. The resulting precipitate was collected by centrifuge and washed with methanol and ethanol, followed by vacuum drying at 60 °C overnight.

**Synthesis of Fe-PPD complex:** The Fe-PPD complex was also prepared by similar procedures by using  $\text{Fe}(\text{NO}_3)_3 \cdot 9\text{H}_2\text{O}$  to substitute  $\text{Co}(\text{NO}_3)_2 \cdot 6\text{H}_2\text{O}$ .

**Synthesis of Co/Fe<sub>x</sub>-PPD complex:** Typically, 50 mg of as-prepared Co-PPD complex was dispersed in 12 mL of *n*-hexane by sonication for 1 h to obtain a homogeneous suspension. Afterwards, 280  $\mu\text{L}$  of  $\text{Fe}(\text{NO}_3)_3 \cdot 9\text{H}_2\text{O}$  methanol solution (25 mg mL<sup>-1</sup>) was added dropwise to the above solution and then the mixed solution was kept for another 1 h under continuous magnetic stirring at room temperature. In

this process, protons produced from the slow hydrolysis of  $\text{Fe}^{3+}$  can induce partial  $\text{Co}^{2+}$  to be dissociated from Co-PPD, which is accompanied with  $\text{Fe}^{3+}$  coordination to the organic ligand as nodes. This cation exchange process is evidenced by supernatant in pink color, caused by  $\text{Co}^{2+}$  released during the reaction. Finally, the resulting product (Co/Fe-PPD) was collected by centrifugation, washed with ethanol for several times and dried at 60 °C overnight. We also prepared a couple of samples by varying  $\text{Fe}^{3+}$  contents introduced into the Co-PPD complex. The products were denoted as Co/Fe<sub>L</sub>-PPD and Co/Fe<sub>H</sub>-PPD, respectively, where subscript L and H represent a low (70  $\mu\text{L}$ ) and high (420  $\mu\text{L}$ ) amounts of added  $\text{Fe}^{3+}$ . In general, these  $\text{Fe}^{3+}$ -incorporated samples (Co/Fe-PPD, Co/Fe<sub>L</sub>-PPD and Co/Fe<sub>H</sub>-PPD) maintained the nanoflower structure of Co-PPD. However, when the amount of added  $\text{Fe}^{3+}$  was over 700  $\mu\text{L}$ , the nanoflower structure of the resultant sample would be destroyed, tending to form featureless nanospheres.

**Synthesis of the Co/CoFe<sub>x</sub>@NC catalyst:** The Co/CoFe<sub>x</sub>@NC catalyst was synthesized by pyrolyzing the Co/Fe<sub>x</sub>-PPD complex in a tube furnace under an Ar atmosphere at 800 °C for 2 h with a ramp rate of 5 °C/min. In the paper, the Co/CoFe@NC signifies a sample with optimized content of Fe, while the Co/CoFe<sub>L</sub>@NC and Co/CoFe<sub>H</sub>@NC denote samples with low and high contents of Fe, respectively.

Monometallic Co@NC and Fe@NC catalysts were synthesized by pyrolyzing the Co-PPD and Fe-PPD complex in a tube furnace under an Ar atmosphere at 800 °C for 2 h with a ramp rate of 5°C/min, respectively.

**Physical characterization:** The structures and compositions of samples were analyzed by powder X-ray diffraction (XRD) using an X-ray diffractometer (Bruker Focuss D8) with Cu K $\alpha$  radiation ( $\lambda=1.54178 \text{ \AA}$ , 40 kV and 40 mA). Fourier transform infrared (FTIR) spectra were recorded from KBr disks using a Thermo Scientific Nicolet 6700 spectroscopy instrument with a scan range of 400-4000  $\text{cm}^{-1}$ . The scanning electron microscopy (SEM) images were collected on a Hitachi S-4800 (Hitachi, Japan). The transmission electron microscopy (TEM) images, high resolution transmission electron microscopy (HRTEM) images, the selected-area-electron-diffraction (SAED) pattern and energy-dispersive X-ray spectroscopy (EDS) elemental mapping images were collected on a microscope (JEM2100F, JEOL, Japan) with an accelerating voltage of 200 kV. The Brunauer-Emmett-Teller (BET) method and the Barrett-Joyner-Halenda (BJH) model were utilized to calculate the specific surface areas and pore size distributions, respectively. The chemical state and elemental composition of samples were analyzed using X-ray photoelectron spectroscopy (XPS ESCALAB 250) technique, all data were corrected using the C 1s peak at 284.8 eV as an internal standard. Raman spectra were recorded on a confocal microscope laser Raman spectrometer (Rainshaw invia).

**Density functional theory (DFT) calculation details:** Calculations were carried out with DFT implanted in the Vienna Ab-initio Simulation Package (VASP) to give a better understanding for the superior activity of Co/CoFe@NC. The Perdew-Burke-

Ernzerhof (PBE) parametrization of the generalized gradient approximation (GGA) is for the exchange-correlation functional. The energy cut-off (ECUT) of the plane wave basis was set as 500 eV and a gamma centered 7\*7\*3 Monkhorst-Pack k-point (KPOINTS) mesh was applied for the k-point samples in the Brillouin zone for the surface model geometry optimization. The tolerance of electronic and ionic relaxation is  $10^{-5}$  eV and 0.01 eV/Å respectively.

**Electrochemical measurements:** The electrocatalytic activities of ORR and OER were evaluated by employing a CHI 760E electrochemical workstation (Shanghai Chenhua instrument, China) coupled with a Pine rotator in a standard three-electrode system. For a working electrode, 5 mg of catalyst was ultrasonically dispersed in a mixed solution containing 0.49 mL of isopropanol and 10  $\mu$ L of 5 wt% Nafion solution to form a homogeneous suspension. The 10  $\mu$ L of the as-prepared catalyst ink was evenly dropped on a clean rotating disk working electrode (RDE) or rotating ring-disk electrode (RRDE) with a catalyst loading of 0.25 mg  $\text{cm}^{-2}$ . The Hg/HgO (1 M KOH) and carbon rod electrodes were used as reference and counter electrodes, respectively and all measured potentials (*vs.* Hg/HgO) in this work were converted to a RHE scale via calibrated equation  $E_{RHE} = E_{\text{Hg/HgO}} + 0.059\text{pH} + 0.098$ .

**ORR measurements:** All the measurements were carried out in O<sub>2</sub>-saturated 0.1 M KOH solution. Linear sweep voltammetry (LSV) tests were conducted at a scan rate of 5 mV s<sup>-1</sup> with different rotation speeds (400, 625, 900, 1225, 1600 and 2025 rpm) from 0.2 to 1.05 V versus RHE. Koutecky-Levich plots ( $J^{-1}$  *vs.*  $\omega^{-1/2}$ ) were fitted into the linear curves, where the slopes and intercepts can be used to calculate the electron transfer number (*n*) and kinetic current density ( $J_k$ ) number according to the Koutecky-Levich equation:

$$J = \frac{1}{J_k} + \frac{1}{J_L} = \frac{1}{J_k} + \frac{1}{B \omega^{-1/2}}$$

$$B = 0.2nFC_0D_0^{2/3}\nu^{-1/6}$$

$$J_k = nFkC_0$$

Where *J* is the measured current densities (mA  $\text{cm}^{-2}$ ),  $J_k$  is the kinetics current density (mA  $\text{cm}^{-2}$ ) and  $J_L$  is the diffusion-limiting current densities (mA  $\text{cm}^{-2}$ ),  $\omega$  is the rotating speed (rpm), *F* is the Faraday constant (96485 C mol<sup>-1</sup>),  $C_0$  is the bulk concentration of O<sub>2</sub> ( $1.2 \times 10^{-6}$  mol  $\text{cm}^{-3}$ ),  $\nu$  is the kinematic viscosity of the electrolyte (0.01 cm<sup>2</sup> s<sup>-1</sup>),  $D_0$  is the O<sub>2</sub> diffusion coefficient ( $1.9 \times 10^{-5}$  cm<sup>2</sup> s<sup>-1</sup>), and *k* is the electron-transfer rate constant.

The electron transfer number (*n*) and the yield of hydrogen peroxide (H<sub>2</sub>O<sub>2</sub>%) can also be calculated based on the rotating ring-disk electrode (RRDE) measurements using the following equation:

$$n = 4 \times \frac{I_d}{I_r/N + I_d}$$

$$\text{H}_2\text{O}_2 (\%) = 200 \times \frac{I_r/N}{I_r/N + I_d}$$

Where  $I_d$  represents the disk current and  $I_r$  represents the ring current.  $N$  is the current collection efficiency of the Pt ring which was determined to be 0.37. The ring potential is fixed at 1.5 V vs. RHE.

**OER measurements:** Prior to measurements, cyclic voltammetry (CV) scanning was conducted at a scan rate of  $50 \text{ mV s}^{-1}$  for 100 cycles to activate the catalyst in  $\text{N}_2$ -saturated 1 M KOH electrolyte. After that, the electrochemically active surface areas (ECSA) of the samples were roughly evaluated based on the electrochemical double-layer capacitance ( $C_{dl}$ ), which was determined from CV curves recorded at different scan rates from 40 to  $160 \text{ mV s}^{-1}$  in the non-Faradaic potential region (1.0-1.1 V). The value of  $C_{dl}$  was calculated according to the following equation:

$$C_{dl} = \frac{j_a - j_c}{2v} = \frac{\Delta j}{2v}$$

Where  $\Delta j$  is the difference between anodic and cathodic current densities recorded at the middle of selected potential range, and  $v$  is the scan rate.

The OER polarization curves were measured at a potential window of 0 - 1 V (vs. RHE) with a sweep rate of  $2 \text{ mV s}^{-1}$  and all the LSV curves were presented without any iR correction. Tafel slopes were calculated from the LSV curves by plotting overpotential ( $\eta$ ) against  $\log(j)$ . The electrochemical impedance spectroscopy (EIS) measurements were carried out at various overpotentials from 10 kHz to 0.1 Hz with an amplitude of 5 mV. The stability of optimized catalyst was characterized by chronopotentiometric test with a constant current at  $10 \text{ mA cm}^{-2}$  for 12 h.

**Assembly and test of aqueous Zn-air batteries:** A home-made aqueous Zn-air battery was assembled with the optimized catalyst loaded carbon paper with gas diffusion layer as the air cathode (mass loading:  $1 \text{ mg cm}^{-2}$ ), a polished Zn foil (thickness: 0.3 mm) as the anode, and 6 M KOH + 0.2 M Zn ( $\text{CH}_3\text{COO}$ )<sub>2</sub> as the electrolyte. For comparison, commercial Pt/C and  $\text{RuO}_2$  mixed catalyst (mass ratio of 1:1) was also prepared by the same procedure to fabricate a liquid primary Zn-air battery. All tests were operated under an ambient atmosphere (oxygen from air). The polarization curves were recorded using a CHI 760E electrochemical working station with the open circuit potential as the initial potential at a scan rate of  $2 \text{ mV s}^{-1}$  and both the current density and power density were normalized to the geometric surface area of the cathode. The galvanostatic discharge-charge curves were collected on a LAND testing station at a current density of  $20 \text{ mA cm}^{-2}$  with 40 min per cycle (20 min for charging and 20 min for discharging).

**Assembly and test of flexible quasi-solid-state Zn-air batteries:** The home-made

flexible quasi-solid-state Zn-air battery was fabricated by using zinc-deposited carbon cloth as the anode, and the as-prepared catalyst loaded on a hydrophilic carbon cloth ( $0.5 \times 2.0 \text{ cm}^2$ , catalyst loading:  $1 \text{ mg cm}^{-2}$ ) as the air cathode. The hydrogel polymer electrolyte was prepared as follows:[1] A concentrated sodium hydroxide solution (5 mL, 20 M) was slowly dropped into an aqueous solution of acrylic acid monomer (7.2 mL, 47 wt%) under vigorous stirring. Thereafter, 110 mg of ammonium persulfate and 4 mg of N, N'-methylenebis-acrylamide were added to the above mixture solution followed by stirring for 30 min at room temperature. Before polymerization, the above mixture solution was degassed with  $\text{N}_2$ . Subsequently, the free-radical polymerization was initiated to proceed at  $45 \text{ }^\circ\text{C}$  for 30 h. Finally, the as-prepared polymer was peeled off and fully dried in an  $80 \text{ }^\circ\text{C}$  oven and then soaked in a mixed solution containing 6 M potassium hydroxide. The flexible quasi-solid-state Zn-air battery was assembled by attaching as-prepared air cathode and Zn anode on the two sides of gel electrolyte. The cycling test of Zn-air battery was conducted using a recurrent galvanostatic pulse method for 5 min of discharge followed by 5 min of charge at a current density of  $5 \text{ mA cm}^{-2}$ . The power density of Zn-air battery was calculated by  $P = IV$ , where I is the discharge current density and V is the corresponding voltage. The specific capacity was calculated according the following equation:

$$\text{Specific capacity} = \frac{\text{current} * \text{service hours}}{\text{weight of consumed zinc}}$$

The following equation is used to calculate hydrogel electrolyte ionic conductivities ( $\sigma$ ):

$$\sigma = d/RS$$

Where d represents the thickness of electrolyte, S is the area of the electrolyte, and R is the ohmic resistance obtained from the electrochemical impedance spectrum.

## **S2 Supplementary Tables and Figures**

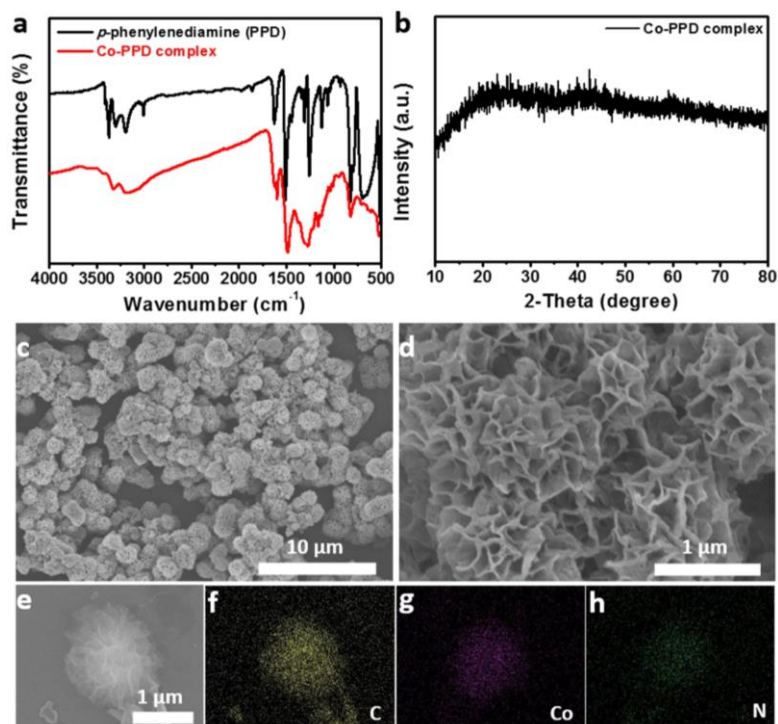

**Fig. S1** **a** FTIR spectra of *p*-phenylenediamine and Co-PPD complex. **b** XRD pattern, **c-e** SEM images and **f-h** corresponding EDS elemental mapping images of C, Co, and N elements of Co-PPD complex

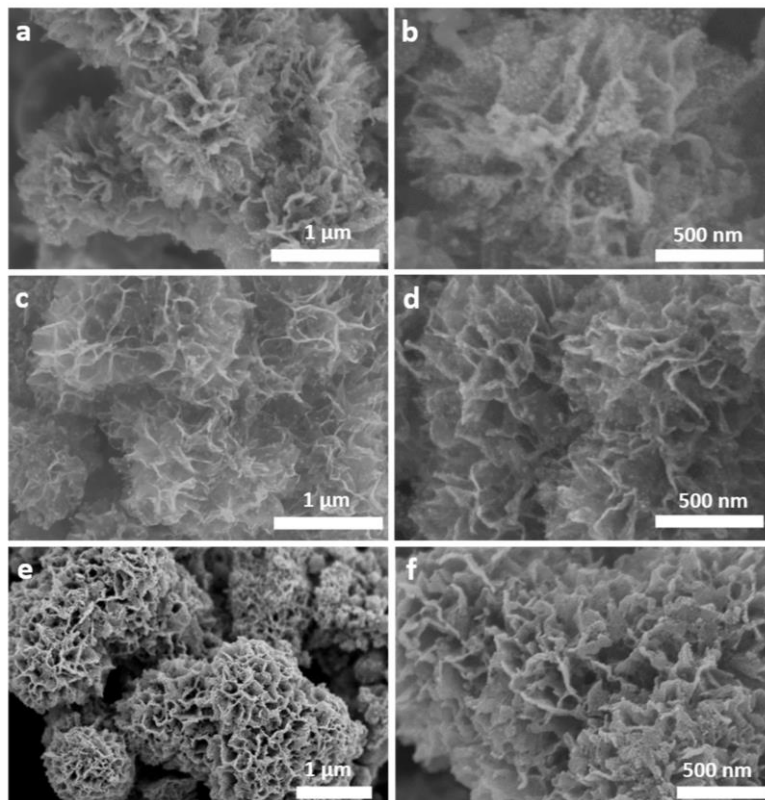

**Fig. S2** SEM images of **a, b** Co@NC, **c, d** Co/CoFe<sub>L</sub>@NC, and **e, f** Co/CoFe<sub>H</sub>@NC catalysts

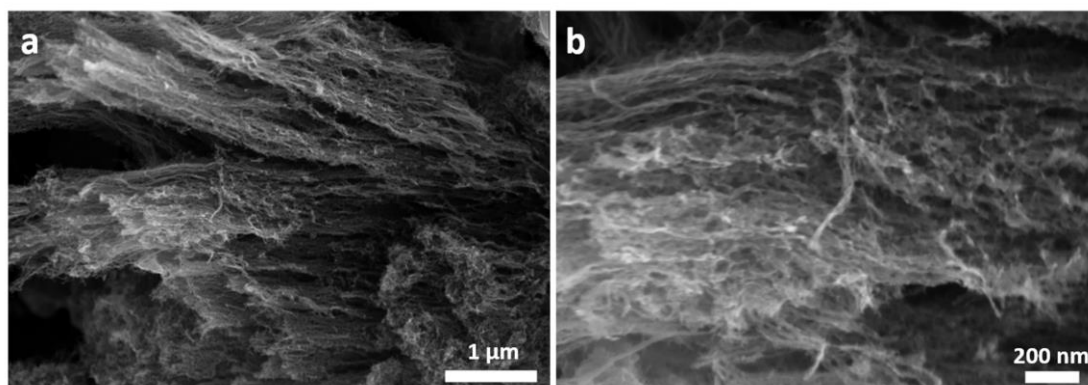

Fig. S3 SEM images of Fe@NC at **a** low and **b** high magnifications

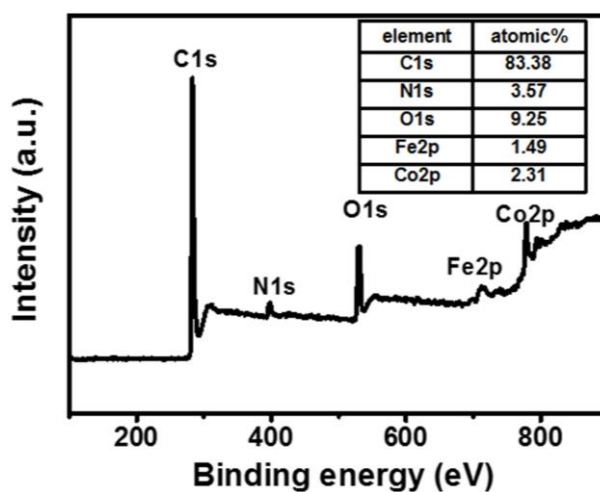

Fig. S4 XPS survey spectrum of as-prepared Co/CoFe@NC catalyst

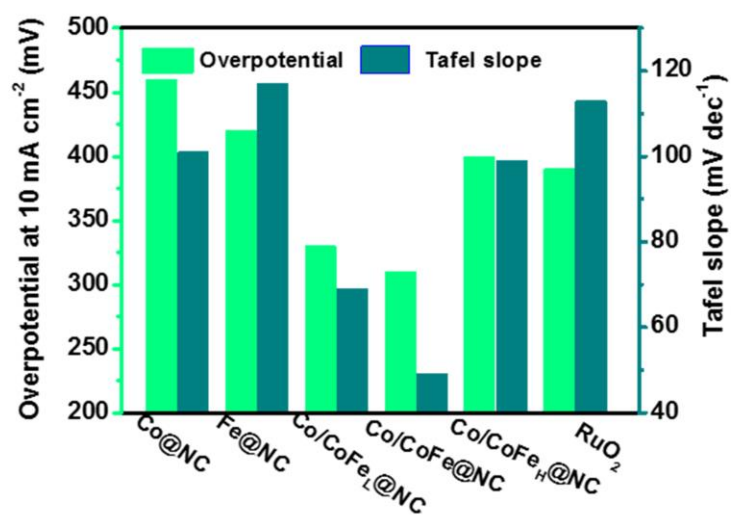

Fig. S5 Comparison of overpotentials and Tafel slopes of different electrodes and RuO<sub>2</sub> toward OER

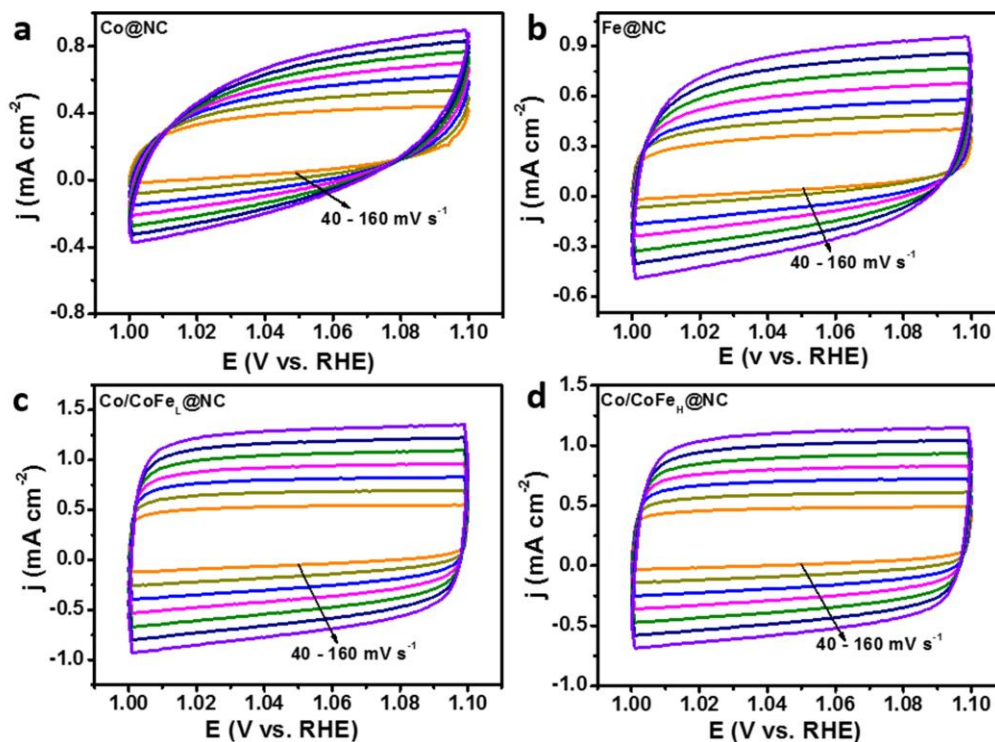

**Fig. S6** CV curves in the double layer region at different scan rates for **a** Co@NC, **b** Co/CoFe<sub>L</sub>@NC, **c** Fe@NC and **d** Co/CoFe<sub>H</sub>@NC

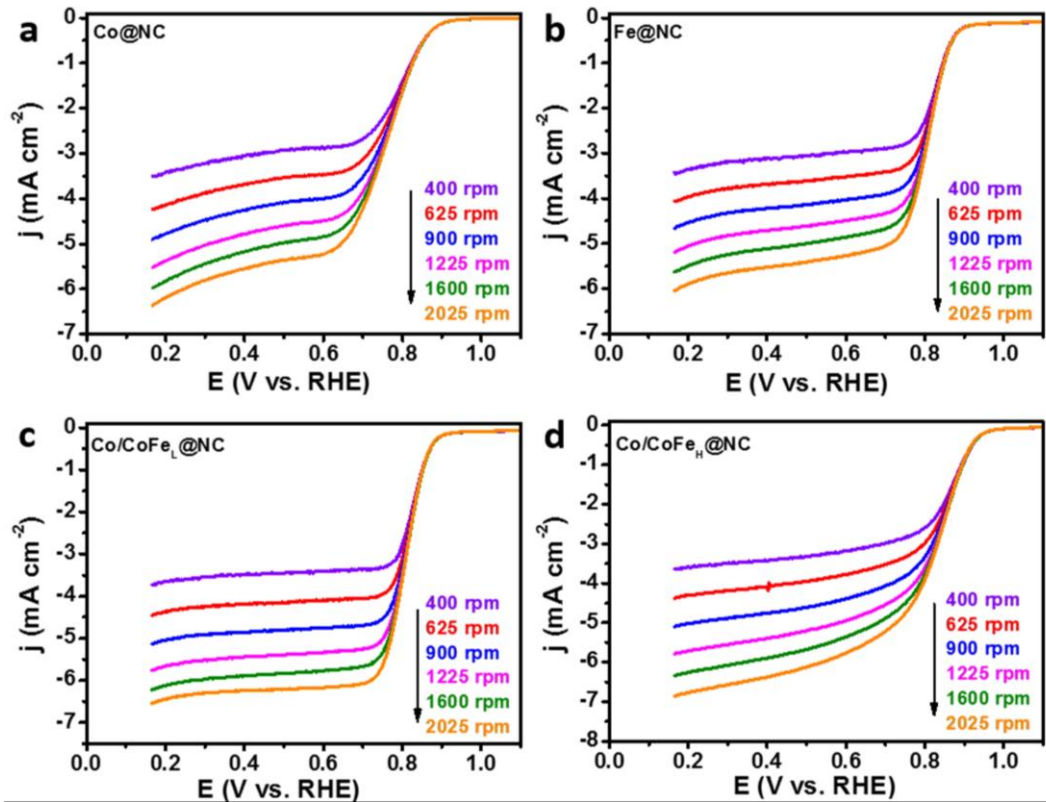

**Fig. S7** RDE polarization profiles of **a** Co@NC, **b** Fe@NC, **c** Co/CoFe<sub>L</sub>@NC and **d** Co/CoFe<sub>H</sub>@NC at various rotation speeds



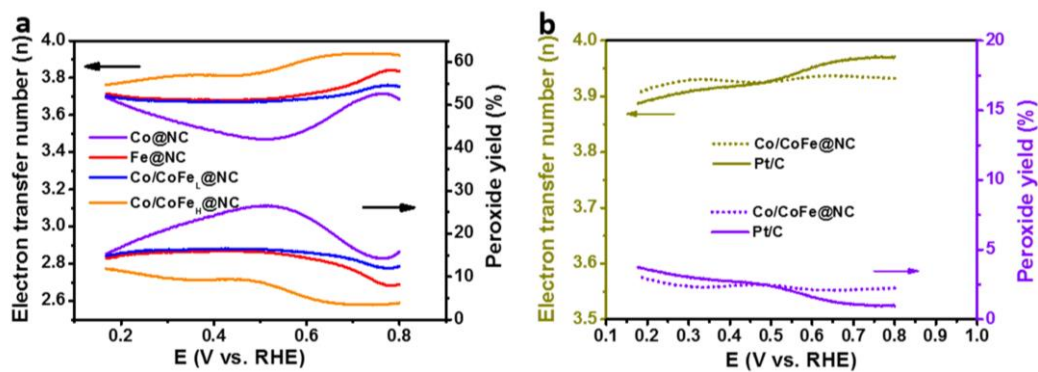

**Fig. S8** RRDE-calculated electron transfer numbers and  $\text{HO}_2^-$  yield during ORR for different catalysts and Pt/C

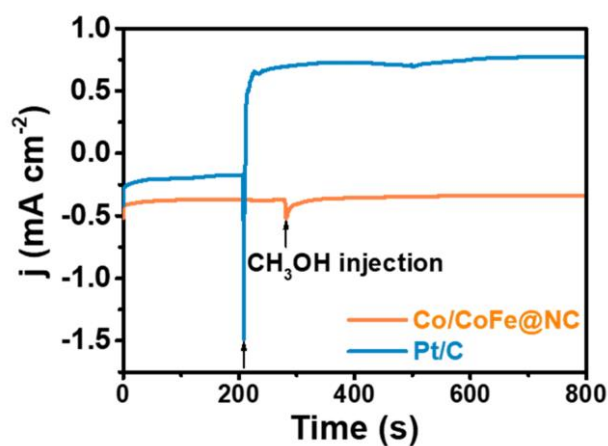

**Fig. S9** Amperometric curves of Co/CoFe@NC and commercial Pt/C at 0.65 V in  $\text{O}_2$ -saturated 0.1 M KOH solution. The arrows indicate the addition of 2% (v/v) methanol into the electrolyte solution

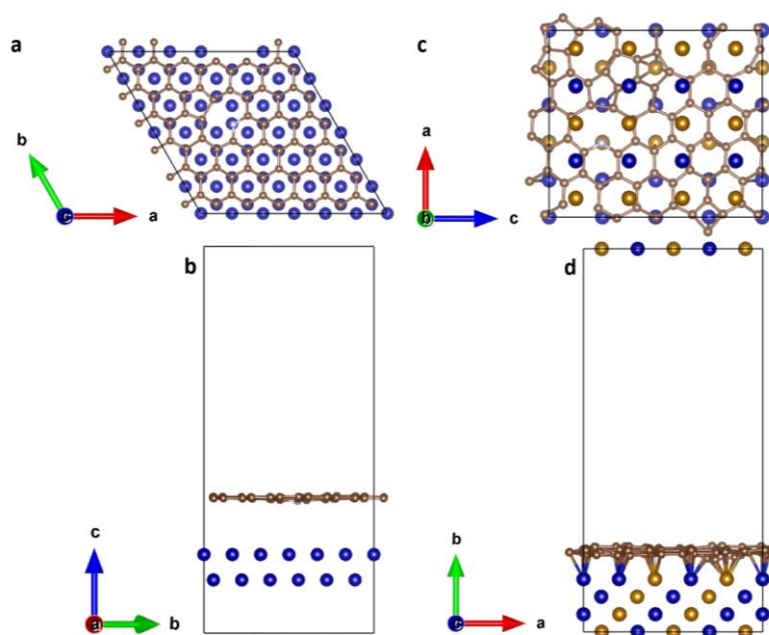

**Fig. S10** Corresponding structural models of **a, b** Co@NC and **c, d** CoFe@NC

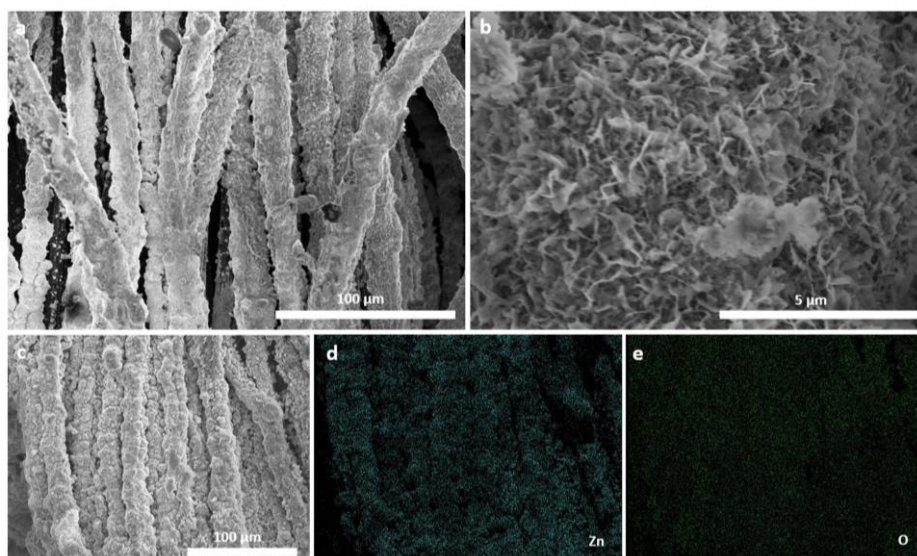

**Fig. S11** **a-c** SEM images of deposited metallic Zn on carbon cloth and corresponding EDS mapping images of **d** Zn and **e** O elements

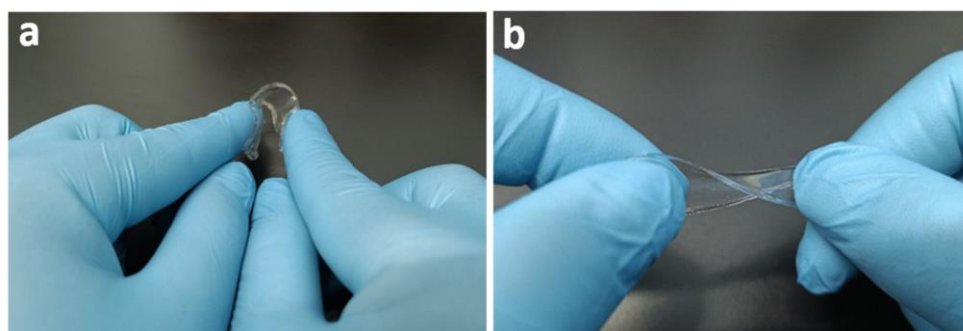

**Fig. S12** Optical photos of the PANA-based hydrogels at **a** bending and **b** twisty states

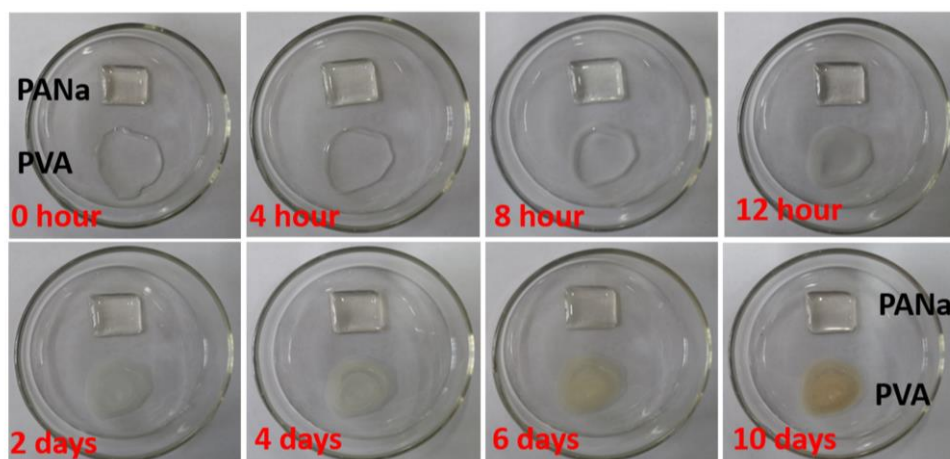

**Fig. S13** Comparison of water holding ability of PANa/6 M KOH and PVA/1 M KOH basic hydrogels

**Table S1** Comparison of the ORR/OER activities of Co/CoFe@NC catalyst with recently reported bifunctional electrocatalysts

| Catalysts                                 | ORR:<br>$E_{1/2}$ (V) | OER:<br>$E_{j=10}$ (V) | $\Delta E =$<br>$E_{j=10} - E_{1/2}$ (V) | Refs.            |
|-------------------------------------------|-----------------------|------------------------|------------------------------------------|------------------|
| <b>Co/CoFe@NC</b>                         | <b>0.84</b>           | <b>1.54</b>            | <b>0.70</b>                              | <b>This work</b> |
| N-GCNT/FeCo-3                             | 0.92                  | 1.73                   | 0.81                                     | [S2]             |
| NiCo@N-C2                                 | 0.81                  | 1.76                   | 0.95                                     | [S3]             |
| Ni <sub>3</sub> Fe/N-C sheet              | 0.76                  | 1.60                   | 0.84                                     | [S4]             |
| Co-N <sub>x</sub> B-CSs                   | 0.83                  | 1.66                   | 0.83                                     | [S5]             |
| FeCo-NCps                                 | 0.84                  | 1.60                   | 0.76                                     | [S6]             |
| Fe-NSDC                                   | 0.84                  | 1.64                   | 0.80                                     | [S7]             |
| FeCo-N <sub>x</sub> -CN-30                | 0.88                  | 1.67                   | 0.79                                     | [S8]             |
| Co-N <sub>x</sub> -C-graphene             | 0.78                  | 1.73                   | 0.95                                     | [S9]             |
| Fe-N-C                                    | 0.83                  | 1.71                   | 0.88                                     | [S10]            |
| Co@NCNTs-800                              | 0.84                  | 1.59                   | 0.75                                     | [S11]            |
| $\alpha$ -MnOx/TiO <sub>2</sub>           | 0.71                  | 1.56                   | 0.76                                     | [S12]            |
| Fe <sub>2</sub> Ni <sub>2</sub> N/Co@NCNT | 0.80                  | 1.51                   | 0.71                                     | [S13]            |
| Ni <sub>3</sub> FeN/NRGO                  | 0.72                  | 1.63                   | 0.91                                     | [S14]            |
| MnO@Co-N/N                                | 0.83                  | 1.76                   | 0.93                                     | [S15]            |
| CoFe/N-GCT                                | 0.79                  | 1.67                   | 0.88                                     | [S16]            |
| Pt/C+RuO <sub>2</sub>                     | 0.85                  | 1.62                   | 0.77                                     | [S17]            |
| Co <sub>3</sub> O <sub>4</sub> /PGC       | 0.68                  | 1.77                   | 1.09                                     | [S18]            |

Note: ORR and OER measurements were carried out in 0.1 M and 1 M KOH electrolyte, respectively.

**Table S2** Performance of liquid rechargeable Zn-air batteries assembled with Co/CoFe@NC catalyst and other bifunctional oxygen electrocatalysts reported in literature

| Catalysts                                 | Peak power density (mW cm <sup>-2</sup> ) | Charge/discharge voltage gap (V) | Specific capacity (mAh g <sub>Zn</sub> <sup>-1</sup> ) | Stability                                       | Refs.     |
|-------------------------------------------|-------------------------------------------|----------------------------------|--------------------------------------------------------|-------------------------------------------------|-----------|
| Co/CoFe@NC                                | 146.6                                     | 0.68@10 mA cm <sup>-2</sup>      | 775.2@5 mA cm <sup>-2</sup>                            | Life time of over 360 h @20 mA cm <sup>-2</sup> | This work |
| CoNC-NB2                                  | 104                                       | 0.92@25 mA cm <sup>-2</sup>      | 698@5 mA cm <sup>-2</sup>                              | Life time of over 140 h @2 mA cm <sup>-2</sup>  | [S19]     |
| FeNiCo@NC-P                               | 112                                       | 0.84@10 mA cm <sup>-2</sup>      | N/A                                                    | Life time of over 135 h @10 mA cm <sup>-2</sup> | [S20]     |
| CoFe/N-GCT                                | 203                                       | 0.80@10 mA cm <sup>-2</sup>      | 748@20 mA cm <sup>-2</sup>                             | Life time of over 275 h @10 mA cm <sup>-2</sup> | [S16]     |
| Co <sub>3</sub> FeN                       | 108                                       | 0.90@5 mA cm <sup>-2</sup>       | 890@5 mA cm <sup>-2</sup>                              | Life time of over 150 h @5 mA cm <sup>-2</sup>  | [S21]     |
| NiFe/N-CNT                                | 300.7                                     | 0.72@10 mA cm <sup>-2</sup>      | 772@10 mA cm <sup>-2</sup>                             | Life time of over 100 h @5 mA cm <sup>-2</sup>  | [S22]     |
| 3DOM-Co@TiO <sub>x</sub> N <sub>y</sub>   | 110                                       | 0.97@10 mA cm <sup>-2</sup>      | 697@20 mA cm <sup>-2</sup>                             | Life time of over 300 h @20 mA cm <sup>-2</sup> | [S23]     |
| CoFe/Co@NC NT@NG                          | 161                                       | 0.82@20 mA cm <sup>-2</sup>      | N/A                                                    | Life time of over 100 h @2 mA cm <sup>-2</sup>  | [S24]     |
| Fe <sub>0.5</sub> Ni <sub>0.5</sub> @N-GR | 85                                        | 0.82@20 mA cm <sup>-2</sup>      | 765@10 mA cm <sup>-2</sup>                             | Life time of over 40 h @20 mA cm <sup>-2</sup>  | [S25]     |
| Co <sub>3</sub> O <sub>4</sub> NC/N-CNT   | 92                                        | 1.02@20 mA cm <sup>-2</sup>      | N/A                                                    | Life time of over 240 h @20 mA cm <sup>-2</sup> | [S26]     |
| Co/Co-N-C                                 | 132                                       | 0.82@10 mA cm <sup>-2</sup>      | N/A                                                    | Life time of over 330 h @10 mA cm <sup>-2</sup> | [S27]     |

## Supplementary References

- [S1] Y. Huang, Z. Li, Z. Pei, Z. Liu, H. Li et al., Solid-state rechargeable Zn//NiCo and Zn-air batteries with ultralong lifetime and high capacity: the role of a sodium polyacrylate hydrogel electrolyte. *Adv. Energy Mater.* **8**, 1802288 (2018). <https://doi.org/10.1002/aenm.201802288>
- [S2] C.-Y. Su, H. Cheng, W. Li, Z.-Q. Liu et al., Atomic modulation of FeCo-nitrogen-carbon bifunctional oxygen electrodes for rechargeable and flexible all-solid-state Zinc-air battery. *Adv. Energy Mater.* **7**, 1602420 (2017). <https://doi.org/10.1002/aenm.201602420>

- [S3] Y. Fu, H.-Y. Yu, C. Jiang, T.-H. Zhang, R. Zhan et al., NiCo alloy nanoparticles decorated on N-doped carbon nanofibers as highly active and durable oxygen electrocatalyst. *Adv. Funct. Mater.* **28**, 1705094 (2018).  
<https://doi.org/10.1002/adfm.201705094>
- [S4] G. Fu, Z. Cui, Y. Chen, Y. Li, Y. Tang et al., Ni<sub>3</sub>Fe-N doped carbon sheets as a bifunctional electrocatalyst for air cathodes. *Adv. Energy Mater.* **7**, 1601172 (2017). <https://doi.org/10.1002/aenm.201601172>
- [S5] Y. Guo, P. Yuan, J. Zhang, Y. Hu, I. S. Amiinu et al., Carbon nanosheets containing discrete Co-N<sub>x</sub>-B<sub>y</sub>-C active sites for efficient oxygen electrocatalysis and rechargeable Zn-air batteries. *ACS Nano* **12**, 1894-1901 (2018).  
<https://doi.org/10.1021/acsnano.7b08721>
- [S6] J. Liu, T. He, Q. Wang, Z. Zhou, Y. Zhang et al., Confining ultrasmall bimetallic alloys in porous N-carbon for use as scalable and sustainable electrocatalysts for rechargeable Zn-air batteries. *J. Mater. Chem.* **7**, 12451-12456 (2019).  
<https://doi.org/10.1039/C9TA02264C>
- [S7] J. Zhang, M. Zhang, Y. Zeng, J. Chen, L. Qiu et al., Single Fe atom on hierarchically porous S, N-codoped nanocarbon derived from porphyrin enable boosted oxygen catalysis for rechargeable Zn-air batteries. *Small* **15**, 1900307 (2019). <https://doi.org/10.1002/sml.201900307>
- [S8] S. Li, C. Cheng, X. Zhao, J. Schmidt, A. Thomas, Active salt/silica-templated 2D mesoporous FeCo-N<sub>x</sub>-Carbon as Bifunctional oxygen electrodes for Zinc-air Batteries. *Angew. Chem. Int. Ed.* **130**, 1856-1862 (2018).  
<https://doi.org/10.1002/anie.201710852>
- [S9] C. Tang, B. Wang, H. F. Wang, Q. Zhang, Defect engineering toward atomic Co-N<sub>x</sub>-C in hierarchical graphene for rechargeable flexible solid Zn-air batteries. *Adv. Mater.* **29**, 1703185 (2017). <https://doi.org/10.1002/adma.201703185>
- [S10] J. Wang, H. Wu, D. Gao, S. Miao, G. Wang et al., High-density iron nanoparticles encapsulated within nitrogen-doped carbon nanoshell as efficient oxygen electrocatalyst for Zinc-air battery. *Nano Energy* **13**, 387-396 (2015).  
<https://doi.org/10.1016/j.nanoen.2015.02.025>
- [S11] Q. Wang, K. Ye, L. Xu, W. Hu, Y. Lei et al., Carbon nanotube-encapsulated cobalt for oxygen reduction: integration of space confinement and N-doping. *Chem. Commun.* **55**, 14801-14804 (2019). <https://doi.org/10.1039/c9cc08439h>
- [S12] S. Song, W. Li, Y.-P. Deng, Y. Ruan, Y. Zhang et al., TiC supported amorphous MnO<sub>x</sub> as highly efficient bifunctional electrocatalyst for corrosion resistant oxygen electrode of Zn-air batteries. *Nano Energy* **67**, 104208 (2020).  
<https://doi.org/10.1016/j.nanoen.2019.104208>
- [S13] M. Wu, G. Zhang, J. Qiao, N. Chen, W. Chen et al., Ultra-long life rechargeable Zinc-air battery based on high-performance trimetallic nitride and NCNT hybrid

- bifunctional electrocatalysts. *Nano Energy* **61**, 86-95 (2019).  
<https://doi.org/10.1016/j.nanoen.2019.04.031>
- [S14] Y. Fan, S. Ida, A. Staykov, T. Akbay, H. Hagiwara et al., Ni-Fe nitride nanoplates on nitrogen-doped graphene as a synergistic catalyst for reversible oxygen evolution reaction and rechargeable Zn-air battery. *Small* **13**, (2017).  
<https://doi.org/10.1002/sml.201700099>
- [S15] Y.-N. Chen, Y. Guo, H. Cui, Z. Xie, X. Zhang et al., Bifunctional electrocatalysts of MOF-derived Co-N/C on bamboo-like MnO nanowires for high-performance liquid- and solid-state Zn-air batteries. *J. Mater. Chem. A* **6**, 9716-9722 (2018). <https://doi.org/10.1039/c8ta01859f>
- [S16] X. Liu, L. Wang, P. Yu, C. Tian, F. Sun et al., A stable bifunctional catalyst for rechargeable zinc-air batteries: iron-cobalt nanoparticles embedded in a nitrogen-doped 3D carbon matrix. *Angew. Chem. Int. Ed.* **57**, 16166-16170 (2018). <https://doi.org/10.1002/anie.201809009>
- [S17] Z. Zhang, Y. P. Deng, Z. Xing, D. Luo, S. Sy et al., "Ship in a Bottle" Design of highly efficient bifunctional electrocatalysts for long-lasting rechargeable Zn-air batteries. *ACS Nano* **13**, 7062-7072 (2019).  
<https://doi.org/10.1021/acsnano.9b02315>
- [S18] H. Zhang, J. Zhang, Y. Li, H. Jiang, H. Jiang et al., Continuous oxygen vacancy engineering of the Co<sub>3</sub>O<sub>4</sub> layer for an enhanced alkaline electrocatalytic hydrogen evolution reaction. *J. Mater. Chem. A* **7**, 13506-13510 (2019).  
<https://doi.org/10.1039/c9ta03652k>
- [S19] H. Luo, W. J. Jiang, S. Niu, X. Zhang, Y. Zhang et al., Self-catalyzed growth of Co-N-C nanobrushes for efficient rechargeable Zn-air batteries. *Small* **16**, 2001171 (2020). <https://doi.org/10.1002/sml.202001171>
- [S20] D. Ren, J. Ying, M. Xiao, Y. P. Deng, J. Ou et al., Hierarchically porous multimetal-based carbon nanorod hybrid as an efficient oxygen catalyst for rechargeable Zinc-air batteries. *Adv. Funct. Mater.* **30**, 1908167 (2019).  
<https://doi.org/10.1002/adfm.201908167>
- [S21] H.-P. Guo, X.-W. Gao, N.-F. Yu, Z. Zheng, W.-B. Luo et al., Metallic state two-dimensional holey-structured Co<sub>3</sub>FeN nanosheets as stable and bifunctional electrocatalysts for Zinc-air batteries. *J. Mater. Chem. A* **7**, 26549-26556 (2019). <https://doi.org/10.1039/c9ta10079b>
- [S22] H. Lei, Z. Wang, F. Yang, X. Huang, J. Liu et al., NiFe nanoparticles embedded N-doped carbon nanotubes as high-efficient electrocatalysts for wearable solid-state Zn-air batteries. *Nano Energy* **68**, 104293 (2020).  
<https://doi.org/10.1016/j.nanoen.2019.104293>
- [S23] G. Liu, J. Li, J. Fu, G. Jiang, G. Lui et al., An Oxygen-vacancy-rich semiconductor-supported bifunctional catalyst for efficient and stable Zinc-air

batteries. *Adv. Mater.* **31**, 1806761 (2019).

<https://doi.org/10.1002/adma.201806761>

- [S24] P. Zhu, J. Gao, S. Liu, Facile in situ coupling CoFe/Co nanoparticles and N-doped carbon nanotubes/graphitic nanosheets as bifunctional oxygen electrocatalysts for rechargeable Zn-air batteries. *J. Power Sources* **449**, 227512 (2020). <https://doi.org/10.1016/j.jpowsour.2019.227512>
- [S25] P. Liu, D. Gao, W. Xiao, L. Ma, K. Sun et al., Self-powered water-splitting devices by core-shell NiFe@N-graphite-based Zn-air Batteries. *Adv. Funct. Mater.* **28**, 1706928 (2018). <https://doi.org/10.1002/adfm.201706928>
- [S26] D. U. Lee, M. G. Park, H. W. Park, M. H. Seo, X. Wang et al., Highly active and durable nanocrystal-decorated bifunctional electrocatalyst for rechargeable Zinc-air batteries. *ChemSusChem* **8**, 3129-38 (2015). <https://doi.org/10.1002/cssc.201500609>
- [S27] P. Yu, L. Wang, F. Sun, Y. Xie, X. Liu et al., Co Nanoislands rooted on Co-N-C Nanosheets as efficient oxygen electrocatalyst for Zn-air batteries. *Adv. Mater.* **31**, 1901666 (2019). <https://doi.org/10.1002/adma.201901666>
